# Supplementary material
Source: PubMed Central journal article supplement (PMC5985472)
Supplement: mmc1.pdf [file mmc1.pdf]

The American Journal of Human Genetics, Volume 102

## Supplemental Data

### ***Otud7a* Knockout Mice Recapitulate**

### **Many Neurological Features**

### **of 15q13.3 Microdeletion Syndrome**

Jiani Yin, Wu Chen, Eugene S. Chao, Sirena Soriano, Li Wang, Wei Wang, Steven E. Cummock, Huifang Tao, Kaifang Pang, Zhandong Liu, Fred A. Pereira, Rodney C. Samaco, Huda Y. Zoghbi, Mingshan Xue, and Christian P. Schaaf

## **Material and Methods for Supplementary Figures**

### **Elevated plus maze**

Anxiety was assessed, using the elevated plus maze, as described previously<sup>1</sup>. Mice at 10 weeks of age were put at the cross area of the maze in white, facing the open arm. The maze was elevated 50 cm from the floor. Activity data was collected over a 10 min period, using the Fusion software (Omnitech electronics) version 4.75.

### **Open field activity**

Locomotor activity and anxiety level were assessed at 10 weeks of age, using the open field assay, as described previously<sup>1</sup>. Activity in a clear acrylic (40 cm × 40 cm × 30 cm) open field arena was recorded over a 30 min period, using the Fusion software version 3.7.

### **Light-dark box exploration**

Anxiety was also assessed in the light-dark box at 10 weeks of age. The apparatus is composed of two adjoining chambers made of plexiglas: a small enclosed chamber (15 cm × 21 cm × 21 cm) with black walls, and a larger chamber (30 cm × 21 cm × 21 cm) with transparent walls and an open top. The two chambers were connected by a small opening. Mice were placed into the illuminated (750 lux) larger chamber and allowed to explore freely for 10 min. Activity data, including the number and latency of entries, and time spent in each compartment, was collected using the Fusion software version 3.7.

### **Self-grooming**

The self-grooming test was used to evaluate compulsive grooming behaviors, as described previously<sup>1</sup>. Each mouse was placed individually into a standard mouse cage with a thin layer of bedding, habituated for at least 30 min, and was then videotaped for

10 min. Time spent on spontaneous grooming of any part of its face, body, limbs, or tail was quantified and subsequently analyzed.

### **Holeboard exploration**

The holeboard exploration test was used to evaluate repetitive nose-poke behavior. Mice at 10 weeks of age were placed into a clear acrylic (40 cm × 40 cm × 30 cm) chamber with a black 16-hole floorboard. Holeboard exploration data was collected, using the Fusion software version 7.7. The number of total and sequential nose-pokes in a 10 min period was quantified.

### **Forced swimming test**

Depression-related behavior was assessed, using the forced swimming test, as previously described<sup>1</sup>. Mice at 12 weeks of age were placed into a 22 cm diameter circular tank with 17 cm deep water at room temperature for 6 min. Immobility time was defined as the duration in which the percentage of immobility was greater than 88% during any 500 msec period. This was automatically determined using the ANY-Maze Video Tracking System version 4.75 (Stoelting Co., IL).

### **Three-chamber test**

Sociability was assessed at 12 weeks of age, using the three-chamber test, as described previously<sup>1</sup>. After a 10 min habituation period, a sex- and age-matched C57BL/6J mouse was placed under one wire cup, and a lego object of similar size and color was placed under the wire cup in the opposite compartment. Test mice were then allowed to explore freely for another 10 min. Data of time spent in each compartment, and the amount of time spent in close contact with each wire cup in the two phases were determined, using

ANY-Maze version 4.75 and manual scoring. Due to seizure occurrence during the test period, one male null mouse was excluded from data analysis of three-chamber test.

### **Partition test**

Interest in social novelty was assessed using the partition test, as described previously<sup>1</sup>. At 12 weeks of age, each test mouse was housed overnight with an age- and sex-matched C57BL/6J partner mouse in the two separate compartments of a partition cage. The next day, activity at the partition board was measured, first with the familiar overnight partner, followed by an unfamiliar partner, and then back to the original familiar partner, for 5 min each. This was manually scored using a Psion Handheld Computer and Observer XT (Noldus Information Technology, Netherlands).

### **Conditioned fear**

Conditioned fear was used to evaluate learning and memory at 13 weeks of age. On the training day, mice were placed into the isolation cubicles (Coulbourn Instruments, PA) and allowed to explore for 2 min. The conditioned stimulus (CS, a white noise 80 dB sound) was then presented for 30 sec and was followed immediately by a mild foot shock (2 sec, 0.7 mA) that served as the unconditioned stimulus (US). The conditioning pattern (2 min rest followed by 30 sec sound stimulus that was paired with foot shock) was then repeated once. Mice were then returned to their homecages. Timing of CS and US presentations and percentage freezing were monitored and assessed using the freeze frame software (Coulbourn instruments, PA).

Approximately 24h after training, mice were placed back into the original chamber to test for contextual fear conditioning. Freezing was recorded over a 5 min period. One hour later, mice were placed into a new chamber with different contextual cues to test for

auditory cued conditioned fear. White Plexiglas inserts were placed on both the floor and sides of the chamber to alter the shape, texture, and color of the chamber, and vanilla extract was placed in the chamber behind the insert to alter the odor. In addition, light condition in the testing room was changed to dim red light. Mice were brought into the room in transfer cages that contained paper towels instead of bedding, and then placed into the new chamber. Freezing was recorded for 3 min during a “pre-CS” phase, followed by another 3 min while the auditory CS was presented.

### **Nest building**

Nest building was evaluated at 14 weeks of age to test for home cage social behaviors, as described previously <sup>2</sup>. Mice were single-housed after the conditioned fear test and a nestlet (5 cm squares of cotton batting) was placed into the cage around 6:00 PM. The following day between 10-11 AM, nest quality was scored on a 5-point scale by an experimenter who was blind to the genotypes, based on the shape and height of the nests <sup>2</sup>.

### **Novel object recognition**

Novel object recognition was used to evaluate the memory of mice at 27 weeks of age. The habituation chamber and test chamber were both transparent plastic chambers (40cm x 24 cm x 20 cm) with no top. The test chamber was surrounded by white boards on three sides (all but the side that faced the observer), with white paper on the bottom. At the side farthest from the observer, three mirrors were placed to assist observation and scoring. Two identical Lego objects for training were placed in the test chamber symmetrically, 5 cm away from the center. Mice were first habituated in the empty chamber for 5 min, and then transferred to the test chamber, in which they were allowed to explore for 5 min. The

test chamber was cleaned with 30% isopropanol between each mouse, to dissipate the odors. Mice were trained for three days. On the fourth day, we tested the mice by replacing one of the objects in the test chamber with a novel Lego object. As a control, on the fifth day, mice were presented the same objects from the training sessions. On all days, the time that mice interacted with each object was manually recorded.

### **Auditory Testing**

Auditory Brainstem Responses (ABRs) and Distortion Product of the Otoacoustic Emissions (DPOAEs) were measured as previously described<sup>3;4</sup>. Briefly, 3 month-old mice, 4 WT (♂), 4 HET (♂), 9 KO (♂), 3 WT (♀), 4 HET (♀), and 6 KO (♀), were anesthetized using an intraperitoneal injection of ketamine (100 mg/kg) and xylazine (10 mg/kg). Normal body temperature was maintained throughout the procedure by placing the mice on a heating pad. Pure tone stimuli from 4 kHz to 48 kHz (ABRs) or 8 kHz to 32 kHz (DPOAEs) were generated using Tucker Davis Technologies System 3 digital signal processing hardware and software (Tucker Davis Technologies, Alachua, FL, USA), and the intensity of the tone stimuli was calibrated using a type 4938 1/4" pressure-field calibration microphone (Brüel and Kjær, Nærum, Denmark). ABR signals were recorded with subcutaneous needle electrodes inserted at the vertex of the scalp, the postauricular region (reference) and the back leg (ground) and the DPOAE distortion-products were captured with a microphone and preamplifier (ER-10B+, Etymotic Research, Inc.). Auditory thresholds were determined by decreasing the sound intensity of each stimulus in 5 dB steps (90 dB to 10 dB for ABRs; 75 dB to 40 dB for DPOAEs) until the lowest sound intensity with reproducible and recognizable ABR waveforms or

2f1-f2 distortion-products was reached. Statistical analysis was performed using Three-way ANOVA with repeated measures.

### **HeLa cell culture and transfection**

HeLa cells were ordered from American Type Culture Collection (ATCC) and cultured in DMEM (Thermo Fisher Scientific, Ca. 11330032) containing 10% FBS and 1% Penicillin/Streptomycin. The cells were tested to be mycoplasma free. Cells were around 90% confluent at the time of transfection. For cells in a 12-well plate, 75  $\mu$ l Opti-MEM (Invitrogen, Ca. 31985-070) and 3  $\mu$ l Lipofectamine 2000 were mixed and incubated for 5 min. At the same time, 75  $\mu$ l of Opti-MEM and 400 ng of each plasmid were mixed and incubated for 5 min. Then, the DNA mixture was added to the Lipofectamine mixture and incubated for 20 min, prior to adding them to the cells.

### **Sholl analysis**

Image stacks were imported to the confocal module of NeuroLucida 360 (MicroBrightfield, Inc., Williston, VT), and neuronal dendritic trees were traced in interactive mode. Sholl analysis was performed for each traced neuron by automatically calculating the number of dendritic intersections and the dendritic length at 10- $\mu$ m interval starting from the soma. Soma area was determined by manually defined soma contours and automatic detection of area over a pre-set thickness threshold. Primary neuronal culture and Sholl analysis have been repeated three times. In total, we investigated 27 primary neurons from wild-type and 26 primary neurons from homozygous knockout mice on DIV 14. Data were analyzed blindly to the genotypes. Statistical analysis was performed using Two-way ANOVA with Tukey's multiple comparisons test.

## References

1. Yin, J., Wu, C., Yang, H., Xue, M., and Schaaf, Christian P. (2017). *Chrna7* deficient mice manifest no consistent neuropsychiatric and behavioral phenotypes. *Scientific reports* 7.
2. Deacon, R.M.J. (2006). Assessing nest building in mice. *Nat Protocols* 1, 1117-1119.
3. Xia, A., Song, Y., Wang, R., Gao, S.S., Clifton, W., Raphael, P., Chao, S.-i., Pereira, F.A., Groves, A.K., and Oghalai, J.S. (2013). *Prestin* regulation and function in residual outer hair cells after noise-induced hearing loss. *PloS one* 8, e82602.
4. Cai, T., Seymour, M.L., Zhang, H., Pereira, F.A., and Groves, A.K. (2013). Conditional deletion of *Atoh1* reveals distinct critical periods for survival and function of hair cells in the organ of Corti. *Journal of Neuroscience* 33, 10110-10122.



**Figure S1**

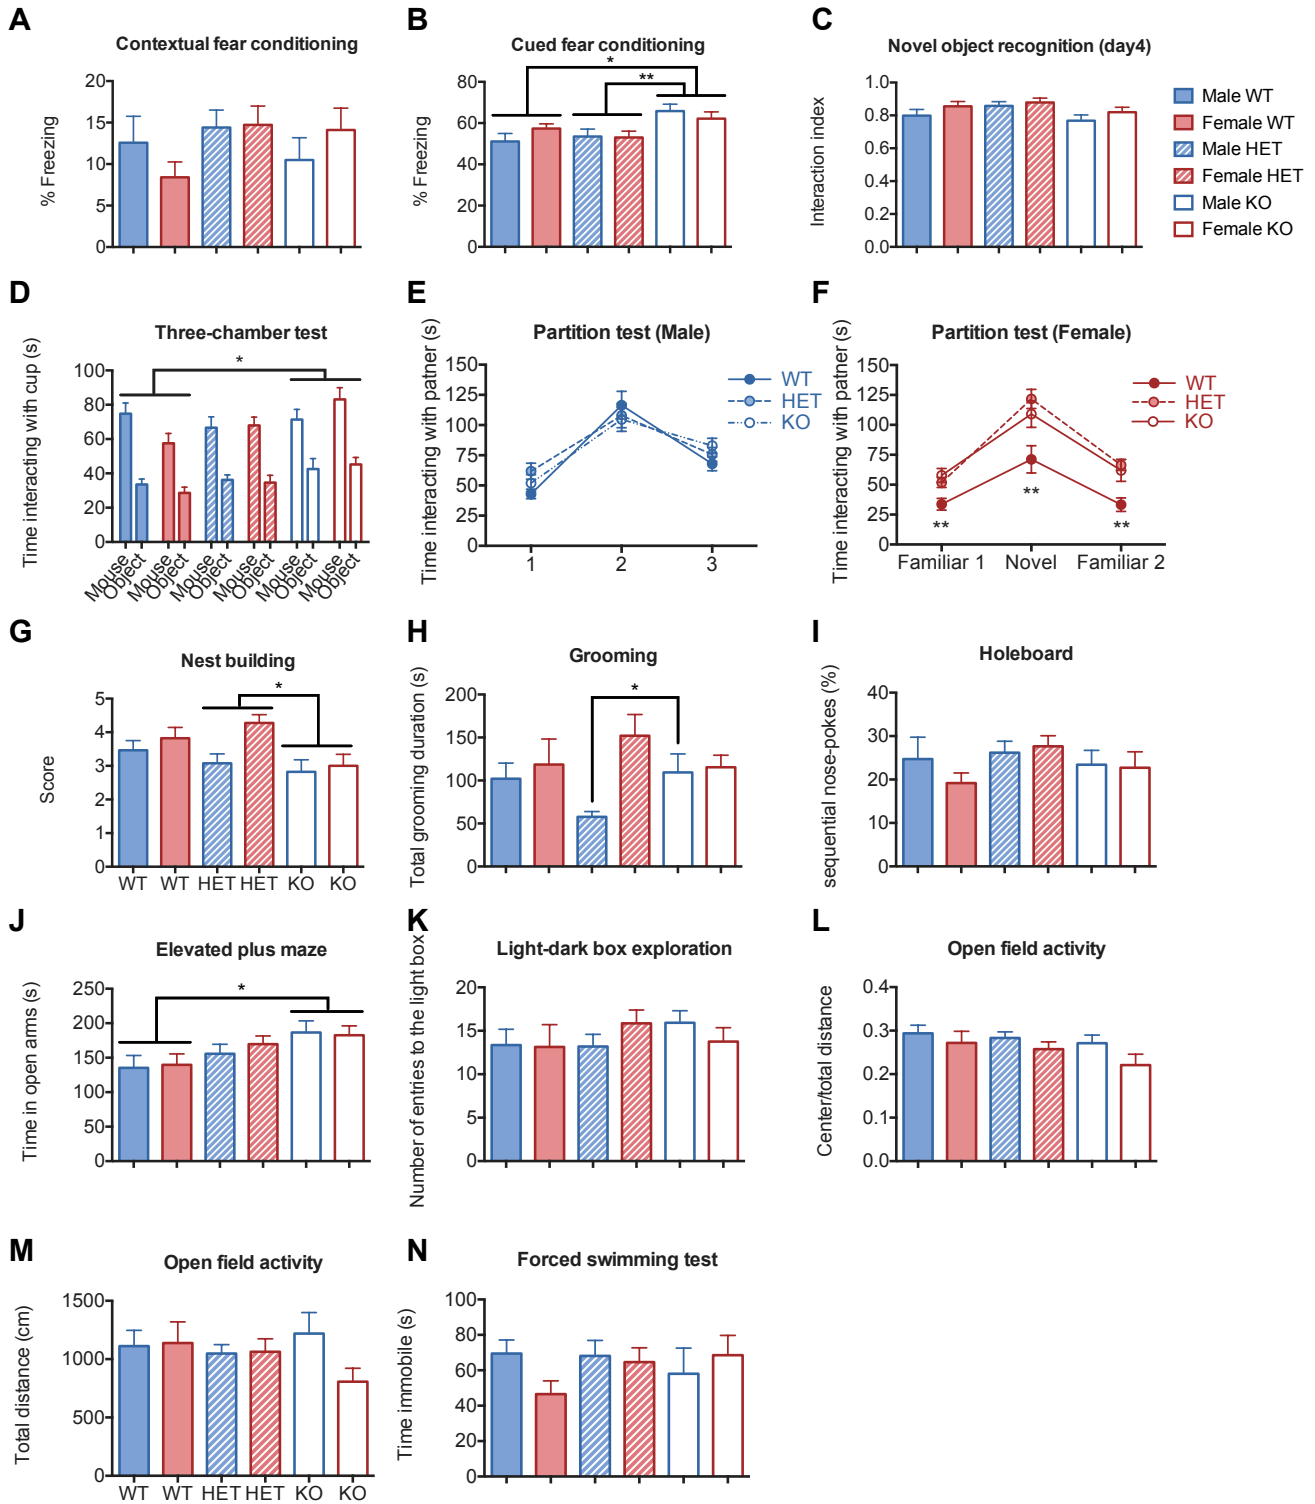

**Figure S1** Additional behavioral phenotypes of mice deficient in *Otud7a*. Behavioral data from male and female adult mice were shown separately, with males in blue and females in red. **A-B**, Null mice show no impairment in learning and memory in contextual or cued fear conditioning. **C**, Null mice show no significant impairment in novel object recognition. **D**, Null mice do not show reduced sociability in three-chamber test. **E-F**, Neither male or female null mice show reduced social novelty in partition test. **G**, Null mice do not show impairment in nest building compared to wild-type littermates. **H**, Null mice do not show repetitive behavior in self-grooming. **I**, Null mice do not show repetitive behavior in holeboard exploration. **J**, Null mice do not show significant difference in anxiety-like behavior, measured by time in the open arms in elevated plus maze. **K**, Null mice do not show anxiety-like behavior in light-dark box test, measured by number of entries into the light box. **L**, Null mice do not show anxiety-like behavior in open field activity, measured by center/total distance. **M**, Null mice do not show significant difference in open field activity, measured by total distance run. **N**, Null mice do not display depression-like behavior in forced swimming test, measured by percent time immobile. Each point represents the mean  $\pm$  SEM (\* $P < 0.05$ , \*\*  $P < 0.01$ ).

**Figure S2**

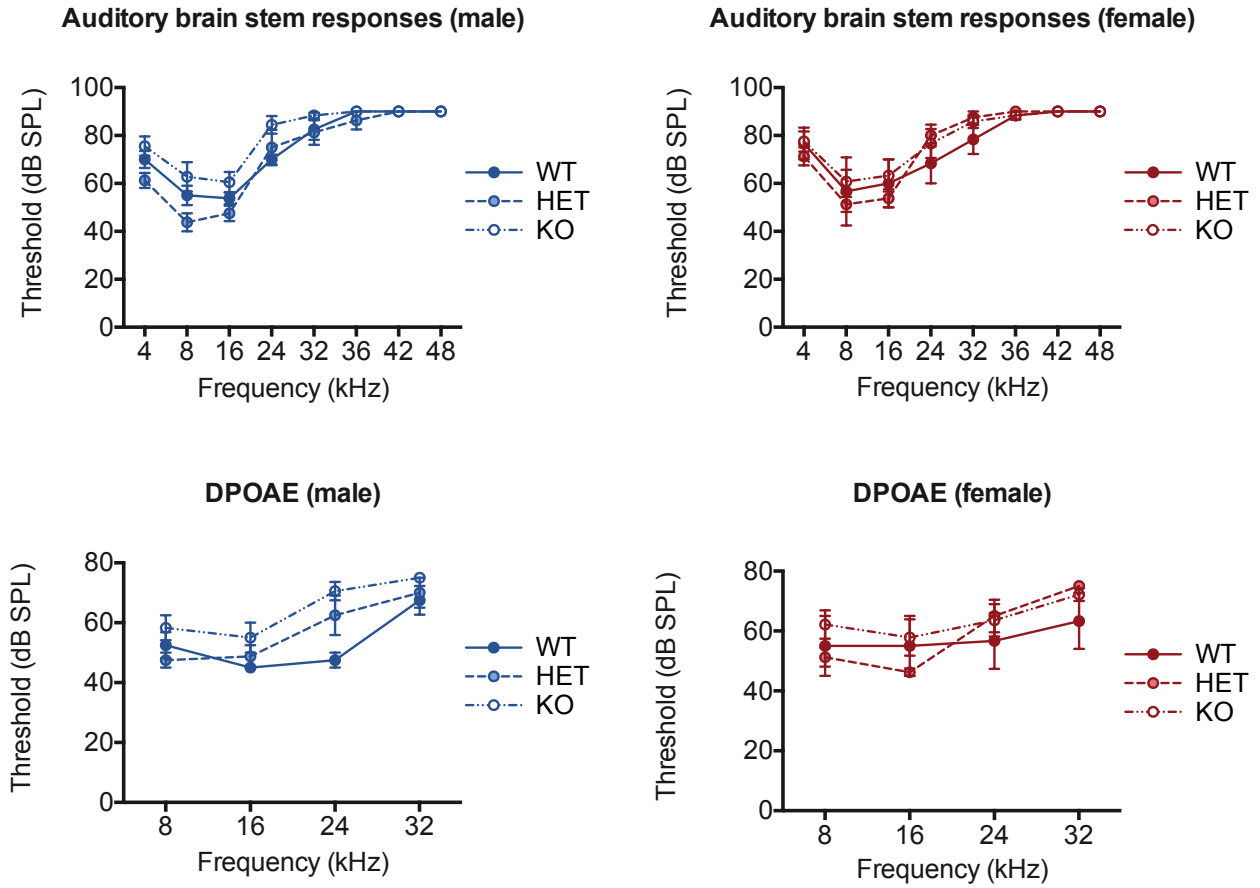

**Figure S2** Hearing ability of *Otud7a* knockout mice is not different from wild-type littermates. Auditory Brainstem Response (ABR) and Distortion Product of Otoacoustic Emissions (DPOAEs) were determined for wild-type and *Otud7a* knockout mice to assess hearing at 3 month-old. Data are presented as mean  $\pm$  SEM.

Figure S3

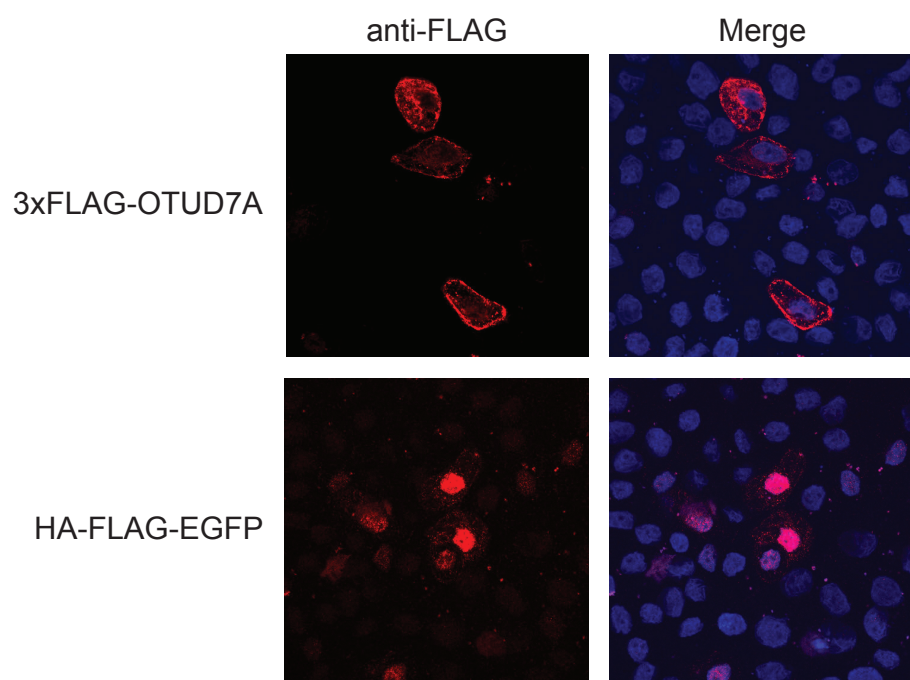

**Figure S3** OTUD7A localizes to the membrane compartments in HeLa cells. HeLa cells were ordered from American Type Culture Collection (ATCC) and cultured in DMEM (Thermo Fisher Scientific, Ca. 11330032) containing 10% FBS and 1% Penicillin/Streptomycin. The cells were tested to be mycoplasma free. Cells were around 90% confluent at the time of transfection. For cells in a 12-well plate, 75  $\mu$ l Opti-MEM (Invitrogen, Ca. 31985-070) and 3  $\mu$ l Lipofectamine 2000 were mixed and incubated for 5 min. At the same time, 75  $\mu$ l of Opti-MEM and 400 ng of each plasmid were mixed and incubated for 5 min. Then, the DNA mixture was added to the Lipofectamine mixture and incubated for 20 min, prior to adding them to the cells. 3xFLAG-OTUD7A was detected on plasma membrane and other membrane compartments after overexpression in HeLa cells. In the control, HA-FLAG-EGFP localizes to the nucleus and cytoplasm after overexpression in HeLa cells. Over-expressed proteins were stained with FLAG antibody (red), and the nucleus was stained with DAPI (blue).

Figure S4

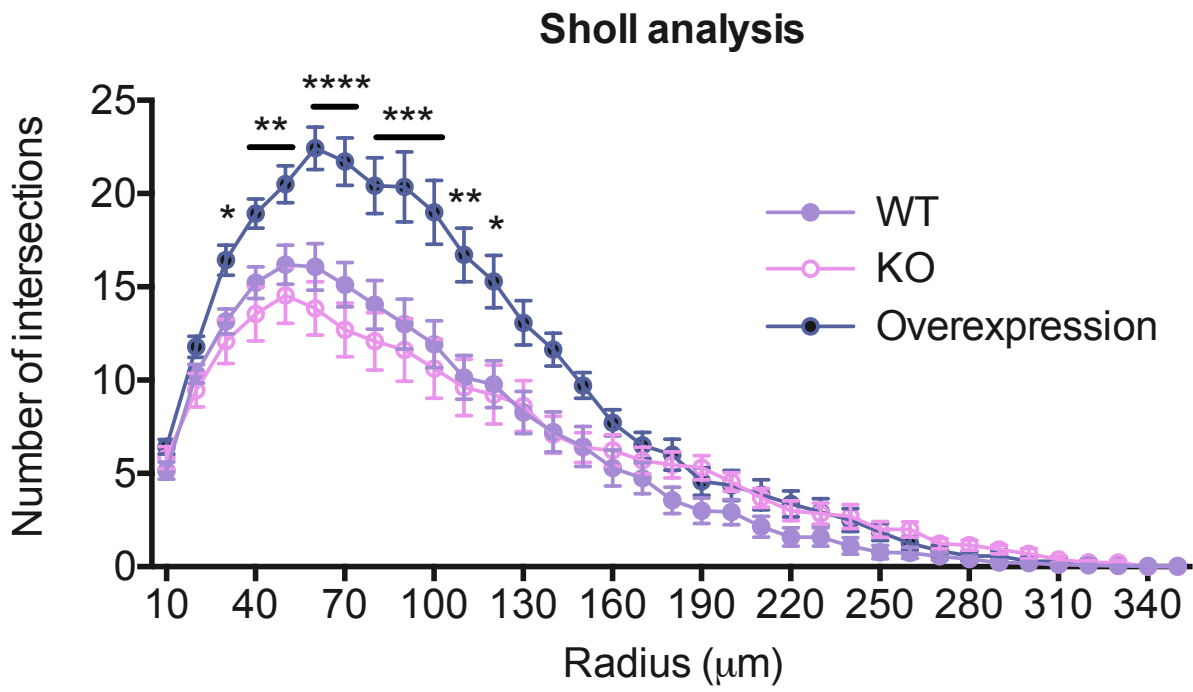

**Figure S4** Sholl analysis of primary neurons indicates a potential role of *Otud7a* in dendritic complexity. Image stacks were imported to the confocal module of NeuroLucida 360 (MicroBrightfield, Inc., Williston, VT), and neuronal dendritic trees were traced in interactive mode. Sholl analysis was performed for each traced neuron by automatically calculating the number of dendritic intersections and the dendritic length at 10- $\mu$ m interval starting from the soma. Soma area was determined by manually defined soma contours and automatic detection of area over a pre-set thickness threshold. Primary neuronal culture and Sholl analysis have been repeated three times. In total, we investigated 27 primary neurons from wild-type and 26 primary neurons from homozygous knockout mice on DIV 14. Data were analyzed blindly to the genotypes. Statistical analysis was performed using Two-way ANOVA with Tukey's multiple comparisons test. Primary neurons (n= 26-27) from *Otud7a* null mice showed no significant difference from wild-type, however, overexpression of *Otud7a* (n =18) led to significantly increased dendritic complexity. Data were obtained from 6 *Otud7a* null mice and 3 wild-type littermates. Data are presented as mean  $\pm$  SEM (\* $P < 0.05$ , \*\*  $P < 0.01$ , \*\*\*  $P < 0.001$ , \*\*\*\*  $P < 0.0001$ ).



**Table S1.** sgRNA off-target candidates and primers used to amplify the corresponding regions.

| <b>sgRNA</b>            | <b>off-target candidates</b> | <b>Forward primer</b>   | <b>Reverse primer</b> |                      |
|-------------------------|------------------------------|-------------------------|-----------------------|----------------------|
| CTAGCGAGGCGGCATGTAAG    | AGAGTGCTTCCTTAGCAAGGCGG      | AAGGCAGGAACCTGCATTG     | TCCCGTCTGATCATCCTTTC  |                      |
|                         | AGACTGCCTACCTAGGGAGGGAG      | TGGGTGACTCTTGTCTGTGG    | AGTCTGCGGTGAAATGGAAT  |                      |
|                         | AGAGTGCTTCCTTAGCAAGCCAG      | AGTGGGCCTCTTCTGGAAT     | AAGTCATAGCCCAGCAGTGG  |                      |
|                         | AAAGTGCTTACCCAGCCAGGGAG      | GGCAATAGGAACCAGTCCAA    | ACAAGCCATTCTTGGCATC   |                      |
|                         | AGGGTTCTTCCTAGAGAGGGAG       | GGGATTGATGTTTTGGTGCT    | ACACCCAGCTGGAAGCTCTA  |                      |
|                         | TGGGTCCCTACCTAGCCAGGAAG      | TTTCATCATGACCCCTGACA    | TTCATTTGCACAGCTCAGG   |                      |
|                         | AAGGTCCTTCCTTAGCGAGGCAG      | CCAGGTCTTGACACACAGCTA   | TGGGGATCAAACCTCAAGGTC |                      |
|                         | AGGGAGCTTCCTAGGGAGGAAG       | CCCAGTCCTGCTTTAACCAA    | ACTTGCCCAAAGTCACCATC  |                      |
|                         | AGGGTGCCTGACTAGCAAGGCAG      | TGACTAGCAAGGCAGCTTGA    | ACTCCACACTCTGGCTGAGG  |                      |
|                         | TGGTTGCTTCCTAGGGAGGAGG       | CATCAGGCAAACTGACCAA     | TAGATGGCCTTGTGGCTTC   |                      |
|                         | AGGGTCATTGCCTAGCGAGCTGG      | CCTCATTTGGCACTTCTGAT    | GTGGGACCTCTTCTGCTCTG  |                      |
|                         | AAGGTGCTTATCTAGAGAGGCAG      | AACCAGGTGTCTGCAAATGA    | GCAATGTGGAAGCACCTTTT  |                      |
|                         | AGGGTGCCTACATAGCGTGCCAG      | ATGCTTCTCCAAGGGAGGAT    | ATGTGGGCTGCGATCTTATC  |                      |
|                         | AGGAAAGCTTCCTAGGGAGGGAG      | AGTGGGAAACACAGCTCCAG    | TCACTTCACCTGACCAGCAC  |                      |
|                         | ATGGTGATTCCTAGCTAGGGAG       | AAGGGTGGCTTCAGACTTGA    | TGACAAGTAGAGGCAGGAGGA |                      |
|                         | GAAGTGTGTGCGAGGCTCGC         | GAAGGGGGAGGGAGGCTCGCTGG | GAGGTGGGATCTTCTGGACA  | TGTGGCAGAAGGTGAGTGAG |
|                         |                              | GCAGTGCACGCGAGGCTCGCGGG | TGCTAGCGGTTTCTGACTT   | ACAGTGAGGGAGAGCGATGT |
| GAGGTGTGTGGGAGGCTGGCTAG |                              | GAGCCACCTTAACCACCGTA    | ATCCACTTTGGTTGCCAAG   |                      |
| GACGCCTGTGCGGGGCTCGCCGG |                              | GCCATCCTGTGCGGTGAAC     | ACGCCTCAGTTTTCCACAC   |                      |
| GAAGTGTCTGAGAGGCTGGCTGG |                              | ATCTGCCACCCTCACTAAGC    | CTGGGCTGACTCAGAAGAGC  |                      |
| GGAGTGGCTGAGAGGCTCGCTGG |                              | AACCTGTCCCTCATTGTGTC    | CACTGCAAACCTGGGAATTT  |                      |
| TAAGTGTCTGCGATGCTCGCTGG |                              | CAAAACAAGCGTCTCCATT     | AGGAAAAGCTGAGCCAATGA  |                      |
| GGAATGTGTGCGAGGCTCACAGG |                              | GTGAGGCAGAAGGGTCATGT    | AGTGTCTGCATCAGCAGTGG  |                      |
| GGAGGCTGTGAGAGGCTCGCAAG |                              | CACCAATCCAATTGTTCGT     | GCTTGGTTAGCCTGCTCATT  |                      |
| GTGGTGTATGCCAGGCTCGCCAG |                              | GGAGGTGACTCCATGGCTAA    | TTGCTCACACATTTGCTTCC  |                      |
| GTGGTGTATGCCAGGCTCGCCAG |                              | GGAGGTGACTCCATGGCTAA    | TTGCTCACACATTTGCTTCC  |                      |
| GTGGTGTATGCCAGGCTCGCCAG |                              | GGAGGTGACTCCATGGCTAA    | TTGCTCACACATTTGCTTCC  |                      |
| GAAGGGTAGGCGAGGCCGCTGG  |                              | AATGAGCACCGGGAAGTAAA    | ACTCGGAGGCTGTGGTTATG  |                      |
| GAAGTGTCTGTGAGGCGCGCGAG |                              | CCAAGCGTCTTTACCTCAG     | GGCACCTCGAATCTTTGCTA  |                      |

**Table S2.** Lipid modification sites predicted in human and mouse OTUD7A and OTUD7B proteins by GPS-lipid software.

| <b>ID</b> | <b>Position</b> | <b>Peptide</b>           | <b>Type</b>      | <b>Score</b> |
|-----------|-----------------|--------------------------|------------------|--------------|
| hOTUD7A   | 14              | PNPTSAEC <u>W</u> AALLHD | S-Palmitoylation | 6.60         |
|           | 137             | RSHVASEC <u>N</u> NEQFPL | S-Palmitoylation | 2.33         |
|           | 196             | WSTVCTSC <u>K</u> RLLPLA | S-Palmitoylation | 1.26         |
|           | 794             | AVGALRPC <u>A</u> TYPQQN | S-Palmitoylation | 1.96         |
| hOTUD7B   | -               | -                        | -                | -            |
| mOTUD7A   | 14              | PNPPSAEC <u>W</u> AALLHD | S-Palmitoylation | 7.23         |
|           | 102             | GHKVERP <u>C</u> LQRQDDI | S-Palmitoylation | 2.81         |
|           | 198             | WSTVCTSC <u>K</u> RLLPLA | S-Palmitoylation | 1.26         |
|           | 802             | TVGALRPC <u>A</u> TYPQQN | S-Palmitoylation | 4.43         |
| mOTUD7B   | -               | -                        | -                | -            |

**Table S3.** Statistic analysis of behaviors in *Onud7a* mutant mice

| Behavioral assay         | Measurement                                                              | Statistical test                       | Comparison              | Statistics | Defrees of freedom | P value | Post hoc                         |                           | Adjusted P value | Interpretation                                                     | Fig.        |        |  |
|--------------------------|--------------------------------------------------------------------------|----------------------------------------|-------------------------|------------|--------------------|---------|----------------------------------|---------------------------|------------------|--------------------------------------------------------------------|-------------|--------|--|
| Developmental delay      | The first day of negative geotaxis                                       | Kruskal-Wallis Test                    | Factor: Genotype        | 14.560     | 2                  | <0.001  | Dunn's multiple comparison test  | WT vs. HET                | >0.999           | KO has significant developmental delay in negative geotaxis.       | Fig. 2b     |        |  |
|                          |                                                                          |                                        |                         |            |                    |         |                                  | WT vs. KO                 | <0.001           |                                                                    |             |        |  |
|                          |                                                                          |                                        |                         |            |                    |         |                                  | HET vs. KO                | 0.003            |                                                                    |             |        |  |
|                          | The first day of cliff aversion                                          | Kruskal-Wallis Test                    | Factor: Genotype        | 14.760     | 2                  | <0.001  | Dunn's multiple comparison test  | WT vs. HET                | >0.999           | KO has significant developmental delay in cliff aversion.          |             |        |  |
|                          |                                                                          |                                        |                         |            |                    |         |                                  | WT vs. KO                 | <0.001           |                                                                    |             |        |  |
|                          |                                                                          |                                        |                         |            |                    |         |                                  | HET vs. KO                | 0.005            |                                                                    |             |        |  |
|                          | The first day of incisor eruption                                        | Kruskal-Wallis Test                    | Factor: Genotype        | 7.794      | 2                  | 0.020   | Dunn's multiple comparison test  | WT vs. HET                | >0.999           | KO has significant developmental delay in incisor eruption.        |             |        |  |
|                          |                                                                          |                                        |                         |            |                    |         |                                  | WT vs. KO                 | 0.029            |                                                                    |             |        |  |
|                          |                                                                          |                                        |                         |            |                    |         |                                  | HET vs. KO                | 0.046            |                                                                    |             |        |  |
|                          | The first day of incisor growth                                          | Kruskal-Wallis Test                    | Factor: Genotype        | 7.041      | 2                  | 0.030   | Dunn's multiple comparison test  | WT vs. HET                | 0.205            | KO has significant developmental delay in incisor growth.          |             |        |  |
|                          |                                                                          |                                        |                         |            |                    |         |                                  | WT vs. KO                 | 0.030            |                                                                    |             |        |  |
|                          |                                                                          |                                        |                         |            |                    |         |                                  | HET vs. KO                | 0.913            |                                                                    |             |        |  |
|                          | The first day of eye lid opening                                         | Kruskal-Wallis Test                    | Factor: Genotype        | 5.188      | 2                  | 0.075   |                                  |                           |                  | KO is not significantly delayed in eye lid opening.                |             |        |  |
|                          |                                                                          |                                        |                         |            |                    |         |                                  |                           |                  |                                                                    |             |        |  |
|                          |                                                                          |                                        |                         |            |                    |         |                                  |                           |                  |                                                                    |             |        |  |
|                          | The first day of ear opening                                             | Kruskal-Wallis Test                    | Factor: Genotype        | 3.399      | 2                  | 0.183   |                                  |                           |                  | KO is not significantly delayed in ear opening.                    |             |        |  |
|                          |                                                                          |                                        |                         |            |                    |         |                                  |                           |                  |                                                                    |             |        |  |
|                          |                                                                          |                                        |                         |            |                    |         |                                  |                           |                  |                                                                    |             |        |  |
| Ultrasonic vocalization  | Number of vocalizations                                                  | Two-Way ANOVA with repeated measures   | Factor1: Genotype       | 8.946      | 2, 61              | <0.001  | Tukey's multiple comparison test | PND2 WT vs. HET           | 0.954            | Fig. 2c                                                            |             |        |  |
|                          |                                                                          |                                        |                         |            |                    |         |                                  | PND2 WT vs. KO            | 0.357            |                                                                    |             |        |  |
|                          |                                                                          |                                        |                         |            |                    |         |                                  | PND2 HET vs. KO           | 0.414            |                                                                    |             |        |  |
|                          |                                                                          |                                        |                         |            |                    |         |                                  | PND4 WT vs. HET           | 0.843            |                                                                    |             |        |  |
|                          |                                                                          |                                        |                         |            |                    |         |                                  | PND4 WT vs. KO            | 0.345            |                                                                    |             |        |  |
|                          |                                                                          |                                        |                         |            |                    |         |                                  | PND4 HET vs. KO           | 0.568            |                                                                    |             |        |  |
|                          |                                                                          |                                        |                         |            |                    |         |                                  | PND6 WT vs. HET           | 0.198            |                                                                    |             |        |  |
|                          |                                                                          |                                        |                         |            |                    |         |                                  | PND6 WT vs. KO            | 0.018            |                                                                    |             |        |  |
|                          |                                                                          |                                        |                         |            |                    |         |                                  | PND6 HET vs. KO           | 0.381            |                                                                    |             |        |  |
|                          |                                                                          |                                        |                         |            |                    |         |                                  | PND8 WT vs. HET           | 0.463            |                                                                    |             |        |  |
|                          |                                                                          |                                        |                         |            |                    |         |                                  | PND8 WT vs. KO            | 0.030            |                                                                    |             |        |  |
|                          |                                                                          |                                        |                         |            |                    |         |                                  | PND8 HET vs. KO           | 0.214            |                                                                    |             |        |  |
|                          |                                                                          |                                        |                         |            |                    |         |                                  | PND10 WT vs. HET          | 0.011            |                                                                    |             |        |  |
| PND10 WT vs. KO          | 0.012                                                                    |                                        |                         |            |                    |         |                                  |                           |                  |                                                                    |             |        |  |
| PND10 HET vs. KO         | 0.972                                                                    |                                        |                         |            |                    |         |                                  |                           |                  |                                                                    |             |        |  |
|                          |                                                                          |                                        | Factor2 (repeated): Day | 3.647      | 4, 244             | 0.007   |                                  |                           |                  |                                                                    |             |        |  |
|                          |                                                                          |                                        | Interaction (F1 x F2)   | 0.702      | 8, 244             | 0.690   |                                  |                           |                  |                                                                    |             |        |  |
| Conditioned fear         | Freezing in contextual fear conditioning (%)                             | Two-Way ANOVA                          | Factor1: Genotype       | 1.403      | 2, 93              | 0.251   |                                  |                           |                  | KO is not significantly different in contextual fear conditioning. | Sup Fig. 1a |        |  |
|                          |                                                                          |                                        |                         |            |                    |         |                                  |                           |                  |                                                                    |             |        |  |
|                          |                                                                          |                                        |                         |            |                    |         |                                  |                           |                  |                                                                    |             |        |  |
|                          |                                                                          |                                        | Factor2: Sex            | 0.001      | 1, 93              | 0.971   |                                  |                           |                  |                                                                    |             |        |  |
|                          |                                                                          |                                        | Interaction (F1 x F2)   | 1.110      | 2, 93              | 0.334   |                                  |                           |                  |                                                                    |             |        |  |
|                          | Freezing in cued fear conditioning (%)                                   | Two-Way ANOVA                          | Factor1: Genotype       | 6.160      | 2, 93              | 0.003   | Tukey's multiple comparison test | WT vs. HET                | 0.953            | Sup Fig. 1b                                                        |             |        |  |
|                          |                                                                          |                                        |                         |            |                    |         |                                  | WT vs. KO                 | 0.022            |                                                                    |             |        |  |
|                          |                                                                          |                                        |                         |            |                    |         |                                  | HET vs. KO                | 0.005            |                                                                    |             |        |  |
|                          |                                                                          |                                        | Factor2: Sex            | 0.068      | 1, 93              | 0.795   |                                  |                           |                  |                                                                    |             |        |  |
|                          |                                                                          |                                        | Interaction (F1 x F2)   | 1.025      | 2, 93              | 0.363   |                                  |                           |                  |                                                                    |             |        |  |
| Novel object recognition | Interaction index (Ratio of time interacting with novel/familiar object) | Two-Way ANOVA                          | Factor1: Genotype       | 3.050      | 2, 95              | 0.052   |                                  |                           |                  | Sup Fig. 1c                                                        |             |        |  |
|                          |                                                                          |                                        |                         |            |                    |         |                                  |                           |                  |                                                                    |             |        |  |
|                          |                                                                          |                                        |                         |            |                    |         |                                  |                           |                  |                                                                    |             |        |  |
|                          |                                                                          |                                        | Factor2: Sex            | 2.948      | 1, 95              | 0.089   |                                  |                           |                  |                                                                    |             |        |  |
|                          |                                                                          |                                        | Interaction (F1 x F2)   | 0.207      | 2, 95              | 0.814   |                                  |                           |                  |                                                                    |             |        |  |
| Rotarod                  | Latency to fall (s)                                                      | Three-Way ANOVA with repeated measures | Factor1: Genotype       | 20.857     | 2, 80              | <0.001  | Tukey's multiple comparison test | WT vs. HET                | >0.999           | Fig. 2e-f                                                          |             |        |  |
|                          |                                                                          |                                        |                         |            |                    |         |                                  | WT vs. KO                 | <0.001           |                                                                    |             |        |  |
|                          |                                                                          |                                        |                         |            |                    |         |                                  | HET vs. KO                | <0.001           |                                                                    |             |        |  |
|                          |                                                                          |                                        |                         |            |                    |         |                                  | Factor2: Sex              | 0.664            |                                                                    | 1, 80       | 0.418  |  |
|                          |                                                                          |                                        |                         |            |                    |         |                                  | Factor3 (repeated): Trial | 19.649           |                                                                    | 7, 560      | <0.001 |  |
|                          |                                                                          |                                        | Interaction (F1 x F2)   | 2.315      | 2, 80              | 0.105   |                                  |                           |                  |                                                                    |             |        |  |
|                          |                                                                          |                                        | Interaction (F1 x F3)   | 2.068      | 14, 560            | 0.012   | Tukey's multiple comparison test | WT vs. HET                | 0.980            |                                                                    |             |        |  |

|                     |                                                     |                                                 |                                   |         |         |        |                                  |            |        |                                                                                       |               |
|---------------------|-----------------------------------------------------|-------------------------------------------------|-----------------------------------|---------|---------|--------|----------------------------------|------------|--------|---------------------------------------------------------------------------------------|---------------|
|                     |                                                     |                                                 |                                   |         |         |        |                                  | WT vs. KO  | <0.001 | KO has significantly reduced motor learning                                           |               |
|                     |                                                     |                                                 |                                   |         |         |        |                                  | HET vs. KO | <0.001 |                                                                                       |               |
|                     |                                                     |                                                 | Interaction (F2 x F3)             | 0.755   | 7, 560  | 0.626  |                                  |            |        |                                                                                       |               |
|                     |                                                     |                                                 | Interaction (F1 x F2 x F3)        | 2.417   | 14, 560 | 0.003  |                                  |            |        |                                                                                       |               |
| Acoustic startle    | Response amplitude                                  | Two-Way ANOVA                                   | Factor1: Genotype                 | 35.970  | 2, 92   | <0.001 | Tukey's multiple comparison test | WT vs. HET | 0.002  |                                                                                       | Fig. 2g       |
|                     |                                                     |                                                 |                                   |         |         |        |                                  | WT vs. KO  | <0.001 | KO has significant acoustic startle deficit.                                          |               |
|                     |                                                     |                                                 |                                   |         |         |        |                                  | HET vs. KO | <0.001 |                                                                                       |               |
|                     |                                                     |                                                 | Factor2: Sex                      | 4.910   | 1, 92   | 0.029  |                                  |            |        |                                                                                       |               |
|                     |                                                     |                                                 | Interaction (F1 x F2)             | 1.678   | 2, 92   | 0.192  |                                  |            |        |                                                                                       |               |
| Prepulse inhibition | Prepulse inhibition at 74 dB prepulse intensity (%) | Two-Way ANOVA                                   | Factor1: Genotype                 | 2.071   | 2, 98   | 0.132  |                                  |            |        | KO is not significantly different in prepulse inhibition at 74 db prepulse intensity. | Fig. 2h-i     |
|                     |                                                     |                                                 | Factor2: Sex                      | 2.125   | 1, 98   | 0.148  |                                  |            |        |                                                                                       |               |
|                     |                                                     |                                                 | Interaction (F1 x F2)             | 0.887   | 2, 98   | 0.415  |                                  |            |        |                                                                                       |               |
|                     | Prepulse inhibition at 78 dB prepulse intensity (%) | Two-Way ANOVA                                   | Factor1: Genotype                 | 1.397   | 2, 98   | 0.252  |                                  |            |        | KO is not significantly different in prepulse inhibition at 78 db prepulse intensity. |               |
|                     |                                                     |                                                 | Factor2: Sex                      | 1.863   | 1, 98   | 0.176  |                                  |            |        |                                                                                       |               |
|                     |                                                     |                                                 | Interaction (F1 x F2)             | 2.354   | 2, 98   | 0.101  |                                  |            |        |                                                                                       |               |
|                     | Prepulse inhibition at 82 dB prepulse intensity (%) | Two-Way ANOVA                                   | Factor1: Genotype                 | 7.916   | 2, 98   | 0.001  |                                  |            |        |                                                                                       |               |
|                     |                                                     |                                                 | Factor2: Sex                      | 8.362   | 1, 98   | 0.005  |                                  |            |        |                                                                                       |               |
|                     |                                                     |                                                 | Interaction (F1 x F2)             | 4.060   | 2, 98   | 0.020  | Split data by sex                |            |        |                                                                                       |               |
|                     |                                                     | One-Way ANOVA on males                          | Factor: Genotype                  | 1.719   | 2, 47   | 0.191  |                                  |            |        |                                                                                       |               |
|                     |                                                     | One-Way ANOVA on females                        | Factor: Genotype                  | 10.240  | 2, 50   | <0.001 | Tukey's multiple comparison test | WT vs. HET | 0.860  |                                                                                       |               |
|                     |                                                     |                                                 |                                   |         |         |        |                                  | WT vs. KO  | 0.001  | Female KO has significant prepulse inhibition deficit at 82 db prepulse intensity.    |               |
|                     |                                                     |                                                 |                                   |         |         |        |                                  | HET vs. KO | 0.001  |                                                                                       |               |
| Three-chamber test  | Time interacting with cups (s)                      | Three-Way ANOVA with repeated measures          | Factor1: Genotype                 | 4.236   | 2, 91   | 0.017  | Tukey's multiple comparison test | WT vs. HET | >0.999 |                                                                                       | Sup Fig. 1d   |
|                     |                                                     |                                                 |                                   |         |         |        |                                  | WT vs. KO  | 0.022  | KO has significantly increased interaction with cups on both sides.                   |               |
|                     |                                                     |                                                 |                                   |         |         |        |                                  | HET vs. KO | 0.072  |                                                                                       |               |
|                     |                                                     |                                                 | Factor2: Sex                      | 0.158   | 1, 91   | 0.692  |                                  |            |        |                                                                                       |               |
|                     |                                                     |                                                 | Factor3 (repeated): Side          | 169.108 | 1, 91   | <0.001 |                                  |            |        |                                                                                       |               |
|                     |                                                     |                                                 | Interaction (F1 x F2)             | 2.227   | 2, 91   | 0.114  |                                  |            |        |                                                                                       |               |
|                     |                                                     |                                                 | Interaction (F1 x F3)             | 0.135   | 2, 91   | 0.874  |                                  |            |        |                                                                                       |               |
|                     |                                                     |                                                 | Interaction (F2 x F3)             | 0.001   | 1, 91   | 0.978  |                                  |            |        |                                                                                       |               |
|                     |                                                     |                                                 | Interaction (F1 x F2 x F3)        | 1.396   | 2, 91   | 0.253  |                                  |            |        |                                                                                       |               |
| Partition test      | Time interacting with partition board (s)           | Three-Way ANOVA with repeated measures          | Factor1: Genotype                 | 8.244   | 2, 89   | 0.001  |                                  |            |        |                                                                                       | Sup Fig. 1e-f |
|                     |                                                     |                                                 | Factor2: Sex                      | 7.438   | 1, 89   | 0.008  |                                  |            |        |                                                                                       |               |
|                     |                                                     |                                                 | Factor3 (repeated): Partner mouse | 101.076 | 2, 178  | <0.001 |                                  |            |        |                                                                                       |               |
|                     |                                                     |                                                 | Interaction (F1 x F2)             | 4.270   | 2, 89   | 0.017  | Split data by sex                |            |        |                                                                                       |               |
|                     |                                                     |                                                 | Interaction (F1 x F3)             | 0.294   | 4, 178  | 0.881  |                                  |            |        |                                                                                       |               |
|                     |                                                     |                                                 | Interaction (F2 x F3)             | 2.446   | 2, 178  | 0.090  |                                  |            |        |                                                                                       |               |
|                     |                                                     |                                                 | Interaction (F1 x F2 x F3)        | 2.725   | 4, 178  | 0.031  | Split data by sex                |            |        |                                                                                       |               |
|                     |                                                     | Two-Way ANOVA with repeated measures on males   | Factor1: Genotype                 | 0.427   | 2, 43   | 0.655  |                                  |            |        |                                                                                       |               |
|                     |                                                     |                                                 | Factor2 (repeated): Partner mouse | 41.423  | 2, 86   | <0.001 |                                  |            |        |                                                                                       |               |
|                     |                                                     |                                                 | Interaction (F1 x F2)             | 1.267   | 4, 86   | 0.290  |                                  |            |        | Male KO is not significantly different in interest in social novelty.                 |               |
|                     |                                                     | Two-Way ANOVA with repeated measures on females | Factor1: Genotype                 | 10.322  | 2, 46   | <0.001 | Tukey's multiple comparison test | WT vs. HET | <0.001 |                                                                                       |               |
|                     |                                                     |                                                 |                                   |         |         |        |                                  | WT vs. KO  | 0.002  | Female KO has significantly increased interaction with partners in general.           |               |
|                     |                                                     |                                                 |                                   |         |         |        |                                  | HET vs. KO | 0.876  | Female HET has significantly increased interaction with partners in general.          |               |
|                     |                                                     |                                                 | Factor2 (repeated): Partner mouse | 66.470  | 2, 92   | <0.001 |                                  |            |        |                                                                                       |               |
|                     |                                                     |                                                 | Interaction (F1 x F2)             | 1.806   | 4, 92   | 0.134  |                                  |            |        | Female KO is not significantly different in interest in social novelty.               |               |
| Nest building       | Scores of nest                                      | Two-Way ANOVA                                   | Factor1: Genotype                 | 3.927   | 2, 92   | 0.023  | Tukey's multiple comparison test | WT vs. HET | 0.986  |                                                                                       | Sup Fig. 1g   |
|                     |                                                     |                                                 |                                   |         |         |        |                                  | WT vs. KO  | 0.068  |                                                                                       |               |

|                            |                                    |                                        |                               |        |         |       |                                  |            |       |                                                                       |             |
|----------------------------|------------------------------------|----------------------------------------|-------------------------------|--------|---------|-------|----------------------------------|------------|-------|-----------------------------------------------------------------------|-------------|
|                            |                                    |                                        |                               |        |         |       |                                  | HET vs. KO | 0.029 | KO has significantly reduced nest building ability (compared to HET). |             |
|                            |                                    |                                        | Factor2: Sex                  | 5.256  | 1, 92   | 0.024 |                                  |            |       |                                                                       |             |
|                            |                                    |                                        | Interaction (F1 x F2)         | 1.714  | 2, 92   | 0.186 |                                  |            |       |                                                                       |             |
| Self-grooming              | Total grooming duration (s)        | Two-Way ANOVA                          | Factor1: Genotype             | 0.088  | 2, 90   | 0.916 |                                  |            |       | KO is not significantly different in grooming duration.               | Sup Fig. 1h |
|                            |                                    |                                        | Factor2: Sex                  | 5.775  | 1, 90   | 0.018 |                                  |            |       |                                                                       |             |
|                            |                                    |                                        | Interaction (F1 x F2)         | 3.428  | 2, 90   | 0.037 | Split data by sex                |            |       |                                                                       |             |
|                            |                                    | One-Way ANOVA on males                 | Factor: Genotype              | 3.850  | 2, 45   | 0.029 | Tukey's multiple comparison test | WT vs. HET | 0.093 |                                                                       |             |
|                            |                                    |                                        |                               |        |         |       |                                  | WT vs. KO  | 0.943 |                                                                       |             |
|                            |                                    |                                        |                               |        |         |       |                                  | HET vs. KO | 0.043 | Not sure                                                              |             |
|                            |                                    | One-Way ANOVA on females               | Factor: Genotype              | 0.874  | 2, 45   | 0.424 |                                  |            |       | Female KO is not significantly different in grooming duration.        |             |
| Holeboard exploration      | Sequential nose-pokes (%)          | Two-Way ANOVA                          | Factor1: Genotype             | 1.393  | 2, 81   | 0.254 |                                  |            |       | KO is not significantly different in holeboard exploration.           | Sup Fig. 1i |
|                            |                                    |                                        | Factor2: Sex                  | 0.344  | 1, 81   | 0.559 |                                  |            |       |                                                                       |             |
|                            |                                    |                                        | Interaction (F1 x F2)         | 0.588  | 2, 81   | 0.558 |                                  |            |       |                                                                       |             |
| Grip strength              | Grip strength (g)                  | Two-Way ANOVA                          | Factor1: Genotype             | 3.596  | 2, 95   | 0.031 | Tukey's multiple comparison test | WT vs. HET | 0.322 |                                                                       | Fig. 2d     |
|                            |                                    |                                        |                               |        |         |       |                                  | WT vs. KO  | 0.026 | KO has significantly reduced grip strength.                           |             |
|                            |                                    |                                        |                               |        |         |       |                                  | HET vs. KO | 0.404 |                                                                       |             |
|                            |                                    |                                        | Factor2: Sex                  | 4.668  | 1, 95   | 0.033 |                                  |            |       |                                                                       |             |
|                            |                                    |                                        | Interaction (F1 x F2)         | 0.185  | 2, 95   | 0.831 |                                  |            |       |                                                                       |             |
| Elevated plus maze         | Time in open arms (s)              | Two-Way ANOVA                          | Factor1: Genotype             | 4.477  | 2, 92   | 0.014 | Tukey's multiple comparison test | WT vs. HET | 0.207 |                                                                       | Sup Fig. 1j |
|                            |                                    |                                        |                               |        |         |       |                                  | WT vs. KO  | 0.010 | KO has significantly increased anxiety level in elevated plus maze.   |             |
|                            |                                    |                                        |                               |        |         |       |                                  | HET vs. KO | 0.294 |                                                                       |             |
|                            |                                    |                                        | Factor2: Sex                  | 0.157  | 1, 92   | 0.693 |                                  |            |       |                                                                       |             |
|                            |                                    |                                        | Interaction (F1 x F2)         | 0.197  | 2, 92   | 0.821 |                                  |            |       |                                                                       |             |
| Light-dark box exploration | Number of entries to the light box | Two-Way ANOVA                          | Factor1: Genotype             | 0.437  | 2, 93   | 0.647 |                                  |            |       | KO is not significantly different in anxiety level.                   | Sup Fig. 1k |
|                            |                                    |                                        | Factor2: Sex                  | 0.004  | 1, 93   | 0.949 |                                  |            |       |                                                                       |             |
|                            |                                    |                                        | Interaction (F1 x F2)         | 1.080  | 2, 93   | 0.344 |                                  |            |       |                                                                       |             |
| Open field activity        | Center/total distance ratio        | Two-Way ANOVA                          | Factor1: Genotype             | 1.603  | 2, 93   | 0.207 |                                  |            |       | KO is not significantly different in anxiety level.                   | Sup Fig. 1l |
|                            |                                    |                                        | Factor2: Sex                  | 3.965  | 1, 93   | 0.049 |                                  |            |       |                                                                       |             |
|                            |                                    |                                        | Interaction (F1 x F2)         | 0.282  | 2, 93   | 0.755 |                                  |            |       |                                                                       |             |
|                            | Total distance traveled (cm)       | Two-Way ANOVA                          | Factor1: Genotype             | 0.333  | 2, 93   | 0.717 |                                  |            |       | KO is not significantly different in total activity.                  | Sup Fig. 1m |
|                            |                                    |                                        | Factor2: Sex                  | 1.338  | 1, 93   | 0.250 |                                  |            |       |                                                                       |             |
|                            |                                    |                                        | Interaction (F1 x F2)         | 1.785  | 2, 93   | 0.174 |                                  |            |       |                                                                       |             |
| Forced swimming test       | Time immobile (%)                  | Two-Way ANOVA                          | Factor1: Genotype             | 0.369  | 2, 93   | 0.693 |                                  |            |       | KO is not significantly different in depression-like behaviors.       | Sup Fig. 1n |
|                            |                                    |                                        | Factor2: Sex                  | 0.435  | 1, 93   | 0.511 |                                  |            |       |                                                                       |             |
|                            |                                    |                                        | Interaction (F1 x F2)         | 1.310  | 2, 93   | 0.275 |                                  |            |       |                                                                       |             |
| Hearing ABR test           | Threshold (dB SPL)                 | Three-Way ANOVA with repeated measures | Factor1: Genotype             | 3.072  | 2, 25   | 0.064 |                                  |            |       | KO is not significantly different in auditory brain stem responses.   | Sup Fig. 2  |
|                            |                                    |                                        | Factor2: Sex                  | 0.338  | 1, 25   | 0.566 |                                  |            |       |                                                                       |             |
|                            |                                    |                                        | Factor3 (repeated): Frequency | 11.817 | 5, 75   | 0.038 |                                  |            |       |                                                                       |             |
|                            |                                    |                                        | Interaction (F1 x F2)         | 0.236  | 2, 25   | 0.791 |                                  |            |       |                                                                       |             |
|                            |                                    |                                        | Interaction (F1 x F3)         | 2.554  | 2, 25   | 0.098 |                                  |            |       |                                                                       |             |
|                            |                                    |                                        | Interaction (F2 x F3)         | 0.677  | 1, 25   | 0.418 |                                  |            |       |                                                                       |             |
|                            |                                    |                                        | Interaction (F1 x F2 x F3)    | 0.515  | 2, 25   | 0.604 |                                  |            |       |                                                                       |             |
| Hearing DPOAE test         | Threshold (dB SPL)                 | Three-Way ANOVA with repeated measures | Factor1: Genotype             | 2.460  | 2, 24   | 0.107 |                                  |            |       | KO is not significantly different in DPOAE.                           | Sup Fig. 2  |
|                            |                                    |                                        | Factor2: Sex                  | 0.446  | 1, 24   | 0.511 |                                  |            |       |                                                                       |             |
|                            |                                    |                                        | Factor3 (repeated): Frequency | 99.622 | 7, 168  | 0.000 |                                  |            |       |                                                                       |             |
|                            |                                    |                                        | Interaction (F1 x F2)         | 0.666  | 2, 24   | 0.523 |                                  |            |       |                                                                       |             |
|                            |                                    |                                        | Interaction (F1 x F3)         | 2.231  | 14, 168 | 0.064 |                                  |            |       |                                                                       |             |
|                            |                                    |                                        | Interaction (F2 x F3)         | 0.922  | 7, 168  | 0.491 |                                  |            |       |                                                                       |             |
|                            |                                    |                                        | Interaction (F1 x F2 x F3)    | 0.311  | 14, 168 | 0.992 |                                  |            |       |                                                                       |             |
